# Supplementary material for: A binder-free δ-MnO2@reduced graphene oxide composite film as a bi-functional electrode for aqueous rechargeable sodium-ion batteries and hybrid capacitive deionization
Source: Royal Society of Chemistry journal article supplement (doi:10.1039/d2nj00673a), 2022-01-01
Supplement: d2nj00673a1.pdf [file d2nj00673a1.pdf]

Electronic Supplementary Material (ESI) for New Journal of Chemistry.

This journal is © The Royal Society of Chemistry and the Centre National de la Recherche Scientifique 2022

## Supplementary Information for

# **Binder-free $\delta$ -MnO<sub>2</sub>@reduced graphene oxide composite film as a bi-functional electrode for aqueous rechargeable sodium-ion battery and hybrid capacitive deionization**

Jun Wang<sup>a</sup>, Daile Zhang<sup>b</sup>, Xiaomin Hu<sup>a\*</sup> and Ting Sun<sup>b\*</sup>

<sup>a</sup> College of Resources and Civil Engineering, Northeastern University, Shenyang 110819, China

<sup>b</sup> College of Sciences, Northeastern University, Shenyang 110819, China

\*Corresponding author: [hxmin\\_jj@163.com](mailto:hxmin_jj@163.com) (Xiaomin Hu), [sun1th@163.com](mailto:sun1th@163.com) (Ting Sun)

### Calculations of deionization performance

$$SAC = \frac{(C_0 - C)V}{m} \quad (1)$$

$$ASAR = \frac{SAC}{t} \quad (2)$$

where V (mL) is the volume and m (mg) represent the total electrode mass. Meanwhile,  $C_0$  and  $C$  ( $\text{mg g}^{-1}$ ) refer to the initial and equilibrium concentrations of the NaCl solution, respectively. In addition,  $t$  (min) is the charging time for the desalination process.

$$A = \frac{SAC \times F}{1000 \times 58.44 \times \Sigma} \quad (3)$$

where  $F$  is Faraday constant ( $96485 \text{ C mol}^{-1}$ ), 58.44 is the molar mass of NaCl and  $\Sigma$  is integral charge during the desalination process (charge,  $\text{C g}^{-1}$ ).

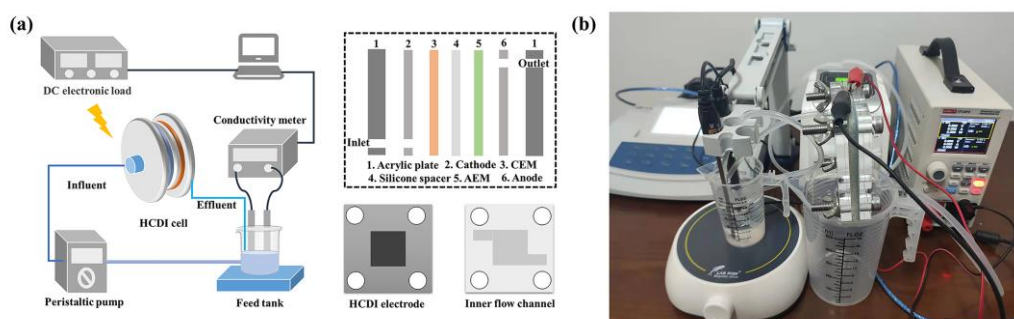

**Fig. S1** (a) Schematic illustration of batch mode HCEDI unit and internal structure and (b) Photographical image of HCEDI experimental set up.

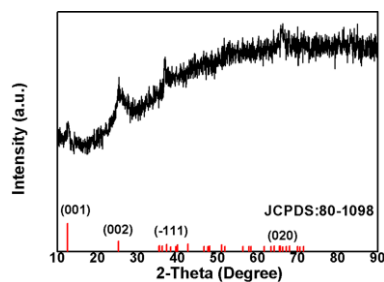

**Fig. S2** XRD patterns of  $\delta\text{-MnO}_2@\text{rGO}/\text{CC}$  sample.

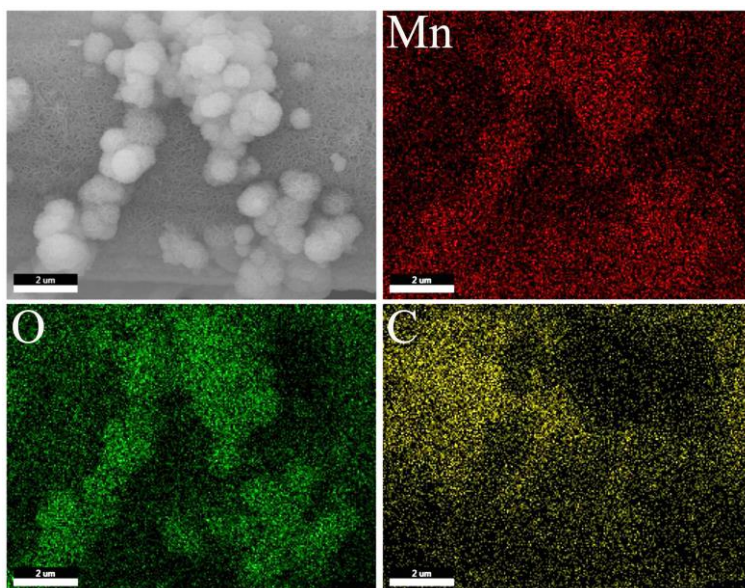

Fig. S3 EDS elemental mapping of  $\delta\text{-MnO}_2\text{@rGO/CC}$  sample.

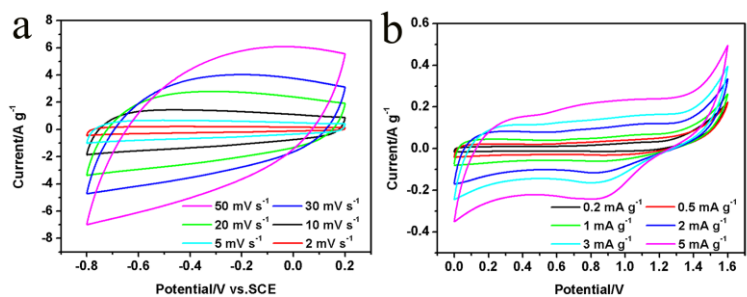

Fig. S4 CVs of AC (a) and  $\delta\text{-MnO}_2\text{@rGO/CC//AC}$  in full cell system (b).

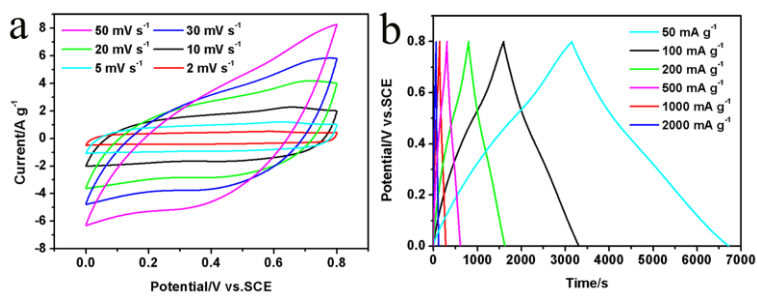

Fig. S5 (a) CVs of  $\delta\text{-MnO}_2\text{@rGO/CC}$  electrodes at 2-50  $\text{mV s}^{-1}$  in 1 M NaCl solution, (b) GCD curves of  $\delta\text{-MnO}_2\text{@rGO/CC}$  electrodes at 50-2000  $\text{mA g}^{-1}$  in 1 M NaCl solution.

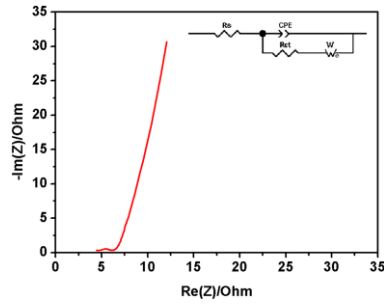

**Fig. S6** Electrochemical impedance spectra of the as prepared  $\delta\text{-MnO}_2@\text{rGO}/\text{CC}$  electrode in 1M NaCl solution.

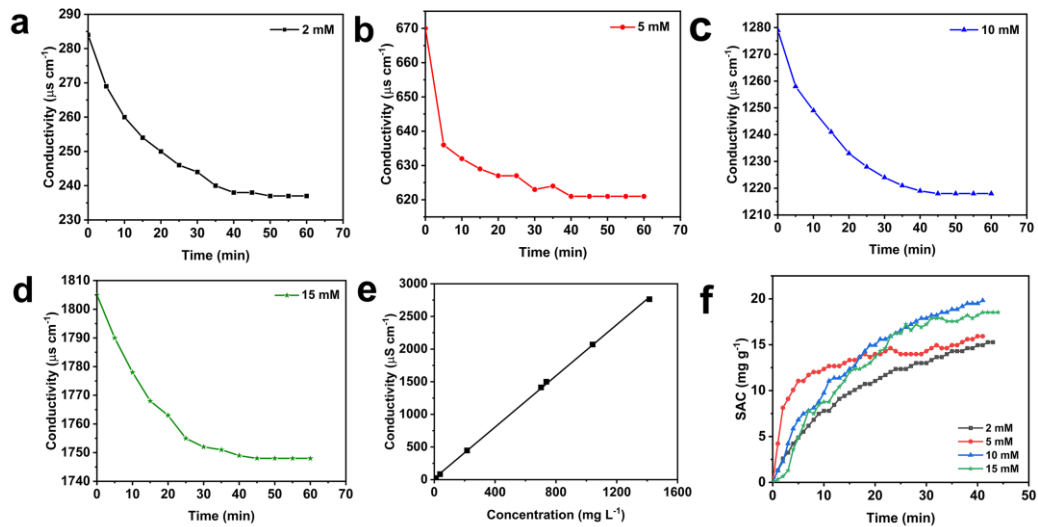

**Fig. S7** (a-d) Electro-adsorption equilibrium curves of different feed concentrations, (e) Correlative curves of NaCl concentration ( $\text{mg L}^{-1}$ ) corresponding to conductivity ( $\mu\text{S cm}^{-1}$ ), (f) The curves of desalination amount vs. charging time of the  $\delta\text{-MnO}_2@\text{rGO}/\text{CC}$  electrode.

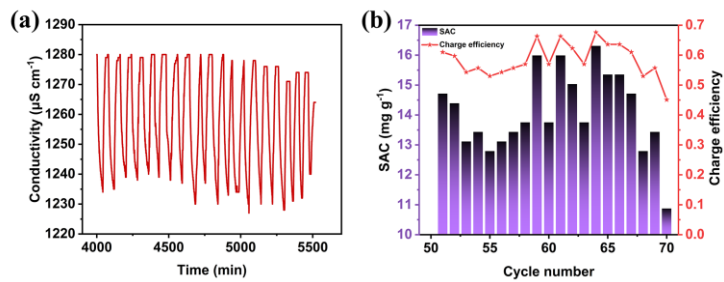

**Fig. S8** (a) Cycling performance of 50-70 cycles, (b) Corresponding deionization capacity and charge efficiency response.

**Table S1.** Obtained impedance parameters and  $D_{Na}$  values of the  $\delta$ -MnO<sub>2</sub>@rGO/CC by EIS.

| Electrode                          | $R_s$<br>( $\Omega$ ) | CPE-T                 | CPE-P | $R_{ct}$<br>( $\Omega$ ) | $\sigma$ | $D_{Na}$<br>( $\text{cm}^2 \text{s}^{-1}$ ) |
|------------------------------------|-----------------------|-----------------------|-------|--------------------------|----------|---------------------------------------------|
| $\delta$ -MnO <sub>2</sub> @rGO/CC | 4.89                  | $8.77 \times 10^{-4}$ | 0.99  | 0.95                     | 2.30     | $2.52 \times 10^{-4}$                       |

**Table S2.** Comparison of deionization performance of various MnO<sub>2</sub> electrodes reported in the literature.

| Electrode                          | Applied voltage<br>(V) | SAC<br>( $\text{mg g}^{-1}$ ) | Cycle number | Ref.      |
|------------------------------------|------------------------|-------------------------------|--------------|-----------|
| $\delta$ -MnO <sub>2</sub> @rGO/CC | 1.2                    | 19.8                          | 50           | this work |
| MnO <sub>2</sub> /NPC              | 1.2                    | 0.99                          | 10           | 1         |
| MnO <sub>2</sub> /PSS/CNT          | 1.2                    | 4.7                           | 10           | 2         |
| GNS@MnO <sub>2</sub>               | 1.2                    | 5.01                          | 50           | 3         |
| ep-AC@MnO <sub>2</sub>             | 1.2                    | 25.7                          | 30           | 4         |
| GO/PPy/MnO <sub>2</sub>            | 1.2                    | 38.4                          | 30           | 5         |
| Mn-Fe-PBAs/CC                      | 1.0                    | 14.47                         | 30           | 6         |
| MnO <sub>2</sub> /AC               | 1.0                    | 9.3                           | 30           | 7         |
| MnO <sub>2</sub> /MWCNTs           | 1.2                    | 6.65                          | -            | 8         |

## References

- 1 J. Yang, L. Zou, H. Song and Z. Hao, *Desalination*, 2011, **276**, 199–206.
- 2 J. Yang, L. Zou and H. Song, *Desalination*, 2012, **286**, 108–114.
- 3 A. G. El-Deen, N. A. M. Barakat and H. Y. Kim, *Desalination*, 2014, **344**, 289–298.
- 4 Y. Liu, B. Geng, Y. Zhang, X. Gao, X. Du, X. Dou, H. Zhu and X. Yuan, *Desalination*, 2021, **504**, 114977.
- 5 Y. Zhang, Y. Wang, J. Xue and C. Tang, *Ind. Eng. Chem. Res.*, 2022, **61**, 3582.
- 6 X. Zhang and J. Dutta, *ACS Appl. Energy Mater.*, 2021, **4**, 8275–8284.
- 7 Y. H. Liu, H. C. Hsi, K. C. Li and C. H. Hou, *ACS Sustain. Chem. Eng.*, 2016, **4**, 4762–4770.
- 8 B. Chen, Y. Wang, Z. Chang, X. Wang, M. Li, X. Liu, L. Zhang and Y. Wu, *RSC Adv.*, 2016, **6**, 6730–6736.
